# Supplementary material for: Quantum chemical simulation of excited states of chlorophylls, bacteriochlorophylls and their complexes
Source: Royal Society of Chemistry journal article supplement (doi:10.1039/b513086g), 2005-12-15
Supplement: b513086g-esi.pdf [file b513086g-esi.pdf]

**Table 1S:** Calculated heavy atom distances in Mg-P.

| Mg-P distance <sup>a)</sup>      | PM5 <sup>b)</sup> | PM3 <sup>b)</sup> | HF/6-31G* | B3LYP/6-31G* | exp. <sup>c)</sup> |
|----------------------------------|-------------------|-------------------|-----------|--------------|--------------------|
| 1-2                              | 1.470             | 1.455             | 1.419     | 1.447        | 1.451              |
| 2-3                              | 1.355             | 1.360             | 1.367     | 1.364        | 1.344              |
| 3-4                              | 1.472             | 1.465             | 1.419     | 1.447        | 1.475              |
| 4-5                              | 1.416             | 1.417             | 1.415     | 1.401        | 1.368              |
| 5-6                              | 1.358             | 1.362             | 1.367     | 1.401        | 1.418              |
| 6-7                              | 1.491             | 1.475             | 1.444     | 1.446        | 1.463              |
| 7-8                              | 1.343             | 1.358             | 1.347     | 1.366        | 1.360              |
| 8-9                              | 1.491             | 1.475             | 1.449     | 1.446        | 1.461              |
| 9-10                             | 1.361             | 1.362             | 1.414     | 1.401        | 1.378              |
| 10-11                            | 1.412             | 1.417             | 1.371     | 1.400        | 1.414              |
| 11-12                            | 1.477             | 1.465             | 1.464     | 1.446        | 1.419              |
| 12-13                            | 1.352             | 1.360             | 1.334     | 1.365        | 1.406              |
| 13-14                            | 1.475             | 1.455             | 1.464     | 1.447        | 1.417              |
| 13-13 <sup>1</sup>               | ----              | ----              | ----      | ----         | 1.429              |
| 13 <sup>1</sup> -13 <sup>2</sup> | ----              | ----              | ----      | ----         | 1.569              |
| 13 <sup>2</sup> -15              | ----              | ----              | ----      | ----         | 1.534              |
| 14-15                            | 1.352             | 1.373             | 1.370     | 1.400        | 1.396              |
| 15-16                            | 1.417             | 1.399             | 1.415     | 1.401        | 1.364              |
| 16-17                            | 1.438             | 1.446             | 1.448     | 1.446        | 1.523              |
| 17-18                            | 1.379             | 1.372             | 1.346     | 1.366        | 1.555              |
| 18-19                            | 1.438             | 1.447             | 1.444     | 1.446        | 1.525              |
| 19-20                            | 1.411             | 1.399             | 1.367     | 1.401        | 1.382              |
| 20-1                             | 1.356             | 1.373             | 1.415     | 1.401        | 1.388              |
| NA-1                             | 1.425             | 1.446             | 1.352     | 1.373        | 1.377              |
| NA-4                             | 1.354             | 1.371             | 1.351     | 1.372        | 1.385              |
| NB-6                             | 1.399             | 1.395             | 1.376     | 1.372        | 1.361              |
| NB-9                             | 1.393             | 1.395             | 1.330     | 1.373        | 1.389              |
| NC-11                            | 1.354             | 1.371             | 1.358     | 1.373        | 1.403              |
| NC-14                            | 1.425             | 1.446             | 1.357     | 1.373        | 1.347              |
| ND-16                            | 1.382             | 1.389             | 1.331     | 1.373        | 1.388              |
| ND-19                            | 1.388             | 1.389             | 1.376     | 1.372        | 1.349              |
| Mg-NA                            | 2.061             | 1.887             | 2.056     | 2.066        | 2.063              |
| Mg-NB                            | 2.049             | 1.825             | 2.058     | 2.066        | 2.093              |
| Mg-NC                            | 2.061             | 1.887             | 2.049     | 2.063        | 2.022              |
| Mg-ND                            | 2.057             | 2.467             | 2.058     | 2.065        | 2.167              |
| A,B,C,Mg                         | 0.003             | 0.000             | 0.000     | 0.000        | 0.385              |
| NA-NB                            | 2.893             | 2.848             | 2.920     | 2.919        | 2.922              |
| NA-NC                            | 4.122             | 3.715             | 4.105     | 4.129        | 4.011              |
| NA-ND                            | 2.929             | 2.829             | 2.920     | 2.919        | 2.954              |
| NB-NC                            | 2.889             | 2.848             | 2.893     | 2.920        | 2.782              |
| NB-ND                            | 4.107             | 4.293             | 4.116     | 4.129        | 4.191              |
| NC-ND                            | 2.926             | 2.829             | 2.892     | 2.920        | 2.946              |

a) 1 is C1; NA is nitrogen in ring A; A,B,C,Mg is the distance between plane NA-NB-NC and the Mg-atom.

b) From ref. 40.

c) From ref. 84.

**Table 2S:** Calculated heavy atom distances in Mg-C.

| Mg-C distance <sup>a)</sup>      | PM5 <sup>b)</sup> | PM3 <sup>b)</sup> | HF/6-31G* | B3LYP/6-31G* | exp. <sup>c)</sup> |
|----------------------------------|-------------------|-------------------|-----------|--------------|--------------------|
| 1-2                              | 1.477             | 1.465             | 1.453     | 1.445        | 1.451              |
| 2-3                              | 1.353             | 1.355             | 1.343     | 1.366        | 1.344              |
| 3-4                              | 1.472             | 1.467             | 1.446     | 1.442        | 1.475              |
| 4-5                              | 1.350             | 1.367             | 1.353     | 1.391        | 1.368              |
| 5-6                              | 1.417             | 1.406             | 1.430     | 1.408        | 1.418              |
| 6-7                              | 1.434             | 1.436             | 1.403     | 1.438        | 1.463              |
| 7-8                              | 1.382             | 1.384             | 1.380     | 1.371        | 1.360              |
| 8-9                              | 1.433             | 1.436             | 1.403     | 1.438        | 1.461              |
| 9-10                             | 1.418             | 1.406             | 1.430     | 1.407        | 1.378              |
| 10-11                            | 1.350             | 1.367             | 1.353     | 1.390        | 1.414              |
| 11-12                            | 1.473             | 1.467             | 1.446     | 1.443        | 1.419              |
| 12-13                            | 1.352             | 1.355             | 1.343     | 1.367        | 1.406              |
| 13-14                            | 1.476             | 1.465             | 1.454     | 1.445        | 1.417              |
| 13-13 <sup>1</sup>               | ----              | ----              | ----      | ----         | 1.429              |
| 13 <sup>1</sup> -13 <sup>2</sup> | ----              | ----              | ----      | ----         | 1.569              |
| 13 <sup>2</sup> -15              | ----              | ----              | ----      | ----         | 1.534              |
| 14-15                            | 1.415             | 1.403             | 1.424     | 1.413        | 1.396              |
| 15-16                            | 1.359             | 1.372             | 1.361     | 1.382        | 1.364              |
| 16-17                            | 1.519             | 1.506             | 1.518     | 1.523        | 1.523              |
| 17-18                            | 1.539             | 1.533             | 1.531     | 1.541        | 1.555              |
| 18-19                            | 1.519             | 1.506             | 1.518     | 1.524        | 1.525              |
| 19-20                            | 1.358             | 1.372             | 1.361     | 1.382        | 1.382              |
| 20-1                             | 1.415             | 1.403             | 1.424     | 1.413        | 1.388              |
| NA-1                             | 1.349             | 1.389             | 1.319     | 1.362        | 1.377              |
| NA-4                             | 1.430             | 1.434             | 1.392     | 1.386        | 1.385              |
| NB-6                             | 1.386             | 1.383             | 1.353     | 1.373        | 1.361              |
| NB-9                             | 1.386             | 1.383             | 1.353     | 1.373        | 1.389              |
| NC-11                            | 1.430             | 1.434             | 1.393     | 1.386        | 1.403              |
| NC-14                            | 1.349             | 1.389             | 1.318     | 1.362        | 1.347              |
| ND-16                            | 1.388             | 1.387             | 1.355     | 1.364        | 1.388              |
| ND-19                            | 1.389             | 1.387             | 1.356     | 1.364        | 1.349              |
| Mg-NA                            | 2.059             | 1.887             | 2.055     | 2.056        | 2.063              |
| Mg-NB                            | 2.065             | 1.841             | 2.063     | 2.071        | 2.093              |
| Mg-NC                            | 2.060             | 1.887             | 2.055     | 2.057        | 2.022              |
| Mg-ND                            | 2.072             | 2.466             | 2.100     | 2.127        | 2.167              |
| A,B,C,Mg                         | 0.000             | 0.000             | 0.000     | 0.000        | 0.385              |
| NA-NB                            | 2.922             | 2.858             | 2.923     | 2.922        | 2.922              |
| NA-NC                            | 4.119             | 3.716             | 4.110     | 4.113        | 4.011              |
| NA-ND                            | 2.916             | 2.831             | 2.927     | 2.956        | 2.954              |
| NB-NC                            | 2.922             | 2.858             | 2.924     | 2.922        | 2.782              |
| NB-ND                            | 4.137             | 4.307             | 4.163     | 4.198        | 4.191              |
| NC-ND                            | 2.916             | 2.831             | 2.926     | 2.955        | 2.946              |

a) 1 is C1; NA is nitrogen in ring A; A,B,C,Mg is the distance between plane NA-NB-NC and the Mg-atom.

b) From ref. 40.

c) From ref. 84.

**Table 3S:** Calculated heavy atom distances in Mg-BC.

| <b>Mg-BC distance<sup>a)</sup></b>   | <b>PM5<sup>b)</sup></b> | <b>PM3<sup>b)</sup></b> | <b>HF/6-31G<sup>*c)</sup></b> | <b>B3LYP/6-31G<sup>*c)</sup></b> | <b>exp.<sup>d)</sup></b> |
|--------------------------------------|-------------------------|-------------------------|-------------------------------|----------------------------------|--------------------------|
| <b>1-2</b>                           | 1.494                   | 1.472                   | 1.383                         | 1.436                            | 1.451                    |
| <b>2-3</b>                           | 1.341                   | 1.348                   | 1.399                         | 1.372                            | 1.344                    |
| <b>3-4</b>                           | 1.494                   | 1.485                   | 1.383                         | 1.436                            | 1.475                    |
| <b>4-5</b>                           | 1.355                   | 1.387                   | 1.449                         | 1.407                            | 1.368                    |
| <b>5-6</b>                           | 1.419                   | 1.386                   | 1.333                         | 1.385                            | 1.418                    |
| <b>6-7</b>                           | 1.519                   | 1.513                   | 1.520                         | 1.523                            | 1.463                    |
| <b>7-8</b>                           | 1.539                   | 1.537                   | 1.535                         | 1.543                            | 1.360                    |
| <b>8-9</b>                           | 1.517                   | 1.506                   | 1.514                         | 1.524                            | 1.461                    |
| <b>9-10</b>                          | 1.340                   | 1.346                   | 1.428                         | 1.384                            | 1.378                    |
| <b>10-11</b>                         | 1.425                   | 1.429                   | 1.358                         | 1.406                            | 1.414                    |
| <b>11-12</b>                         | 1.420                   | 1.427                   | 1.474                         | 1.436                            | 1.419                    |
| <b>12-13</b>                         | 1.395                   | 1.386                   | 1.327                         | 1.372                            | 1.406                    |
| <b>13-14</b>                         | 1.420                   | 1.420                   | 1.473                         | 1.436                            | 1.417                    |
| <b>13-13<sup>1</sup></b>             | ----                    | ----                    | ----                          | ----                             | 1.429                    |
| <b>13<sup>1</sup>-13<sup>2</sup></b> | ----                    | ----                    | ----                          | ----                             | 1.569                    |
| <b>13<sup>2</sup>-15</b>             | ----                    | ----                    | ----                          | ----                             | 1.534                    |
| <b>14-15</b>                         | 1.426                   | 1.423                   | 1.358                         | 1.407                            | 1.396                    |
| <b>15-16</b>                         | 1.339                   | 1.347                   | 1.428                         | 1.384                            | 1.364                    |
| <b>16-17</b>                         | 1.517                   | 1.505                   | 1.514                         | 1.524                            | 1.523                    |
| <b>17-18</b>                         | 1.540                   | 1.532                   | 1.535                         | 1.543                            | 1.555                    |
| <b>18-19</b>                         | 1.518                   | 1.507                   | 1.521                         | 1.524                            | 1.525                    |
| <b>19-20</b>                         | 1.419                   | 1.427                   | 1.333                         | 1.384                            | 1.382                    |
| <b>20-1</b>                          | 1.355                   | 1.352                   | 1.448                         | 1.407                            | 1.388                    |
| <b>NA-1</b>                          | 1.396                   | 1.459                   | 1.361                         | 1.376                            | 1.377                    |
| <b>NA-4</b>                          | 1.397                   | 1.377                   | 1.361                         | 1.376                            | 1.385                    |
| <b>NB-6</b>                          | 1.330                   | 1.347                   | 1.407                         | 1.361                            | 1.361                    |
| <b>NB-9</b>                          | 1.431                   | 1.417                   | 1.292                         | 1.361                            | 1.389                    |
| <b>NC-11</b>                         | 1.388                   | 1.398                   | 1.362                         | 1.376                            | 1.403                    |
| <b>NC-14</b>                         | 1.388                   | 1.414                   | 1.362                         | 1.376                            | 1.347                    |
| <b>ND-16</b>                         | 1.430                   | 1.435                   | 1.292                         | 1.362                            | 1.388                    |
| <b>ND-19</b>                         | 1.329                   | 1.332                   | 1.408                         | 1.362                            | 1.349                    |
| <b>Mg-NA</b>                         | 2.060                   | 1.881                   | 2.013                         | 2.048                            | 2.063                    |
| <b>Mg-NB</b>                         | 2.097                   | 1.837                   | 2.136                         | 2.140                            | 2.093                    |
| <b>Mg-NC</b>                         | 2.036                   | 1.885                   | 2.056                         | 2.046                            | 2.022                    |
| <b>Mg-ND</b>                         | 2.097                   | 2.505                   | 2.136                         | 2.139                            | 2.167                    |
| <b>A,B,C,Mg</b>                      | 0.002                   | 0.005                   | 0.002                         | 0.001                            | 0.385                    |
| <b>NA-NB</b>                         | 2.906                   | 2.889                   | 2.974                         | 2.962                            | 2.922                    |
| <b>NA-NC</b>                         | 4.096                   | 3.697                   | 4.068                         | 4.094                            | 4.011                    |
| <b>NA-ND</b>                         | 2.905                   | 2.801                   | 2.974                         | 2.961                            | 2.954                    |
| <b>NB-NC</b>                         | 2.956                   | 2.849                   | 2.924                         | 2.961                            | 2.782                    |
| <b>NB-ND</b>                         | 4.193                   | 4.341                   | 4.270                         | 4.279                            | 4.191                    |
| <b>NC-ND</b>                         | 2.957                   | 2.865                   | 2.924                         | 2.961                            | 2.946                    |

a) 1 is C1; NA is nitrogen in ring A; A,B,C,Mg is the distance between plane NA-NB-NC and the Mg-atom.

b) From ref. 40.

c) From ref. 41.

d) From ref. 84.

**Table 4S:** Calculated heavy atom distances in Chl *a*.

| Chl <i>a</i><br>distance <sup>a)</sup> | PM5 <sup>b)</sup> | PM3 <sup>b)</sup> | HF/6-31G* | B3LYP/6-31G* | exp. <sup>c)</sup> |
|----------------------------------------|-------------------|-------------------|-----------|--------------|--------------------|
| 1-2                                    | 1.492             | 1.473             | 1.482     | 1.452        | 1.451              |
| 2-3                                    | 1.357             | 1.372             | 1.339     | 1.383        | 1.344              |
| 3-4                                    | 1.490             | 1.478             | 1.480     | 1.461        | 1.475              |
| 4-5                                    | 1.343             | 1.355             | 1.351     | 1.391        | 1.368              |
| 5-6                                    | 1.435             | 1.433             | 1.446     | 1.411        | 1.418              |
| 6-7                                    | 1.452             | 1.452             | 1.447     | 1.450        | 1.463              |
| 7-8                                    | 1.379             | 1.380             | 1.359     | 1.378        | 1.360              |
| 8-9                                    | 1.451             | 1.452             | 1.448     | 1.452        | 1.461              |
| 9-10                                   | 1.383             | 1.394             | 1.368     | 1.405        | 1.378              |
| 10-11                                  | 1.382             | 1.393             | 1.416     | 1.399        | 1.414              |
| 11-12                                  | 1.453             | 1.454             | 1.406     | 1.451        | 1.419              |
| 12-13                                  | 1.383             | 1.389             | 1.403     | 1.390        | 1.406              |
| 13-14                                  | 1.453             | 1.446             | 1.389     | 1.420        | 1.417              |
| 13-13 <sup>1</sup>                     | 1.438             | 1.463             | 1.452     | 1.461        | 1.429              |
| 13 <sup>1</sup> -13 <sup>2</sup>       | 1.582             | 1.568             | 1.564     | 1.585        | 1.569              |
| 13 <sup>2</sup> -15                    | 1.520             | 1.525             | 1.535     | 1.536        | 1.534              |
| 14-15                                  | 1.435             | 1.424             | 1.444     | 1.414        | 1.396              |
| 15-16                                  | 1.345             | 1.366             | 1.339     | 1.381        | 1.364              |
| 16-17                                  | 1.520             | 1.525             | 1.520     | 1.523        | 1.523              |
| 17-18                                  | 1.560             | 1.556             | 1.542     | 1.550        | 1.555              |
| 18-19                                  | 1.529             | 1.519             | 1.520     | 1.526        | 1.525              |
| 19-20                                  | 1.383             | 1.361             | 1.409     | 1.391        | 1.382              |
| 20-1                                   | 1.392             | 1.434             | 1.383     | 1.410        | 1.388              |
| NA-1                                   | 1.358             | 1.348             | 1.338     | 1.364        | 1.377              |
| NA-4                                   | 1.424             | 1.442             | 1.376     | 1.379        | 1.385              |
| NB-6                                   | 1.360             | 1.366             | 1.313     | 1.365        | 1.361              |
| NB-9                                   | 1.417             | 1.428             | 1.391     | 1.378        | 1.389              |
| NC-11                                  | 1.425             | 1.434             | 1.385     | 1.394        | 1.403              |
| NC-14                                  | 1.330             | 1.343             | 1.310     | 1.335        | 1.347              |
| ND-16                                  | 1.421             | 1.387             | 1.403     | 1.377        | 1.388              |
| ND-19                                  | 1.361             | 1.410             | 1.311     | 1.358        | 1.349              |
| Mg-NA                                  | 2.030             | 2.370             | 2.020     | 2.030        | 2.063              |
| Mg-NB                                  | 2.088             | 2.438             | 2.077     | 2.073        | 2.093              |
| Mg-NC                                  | 2.029             | 1.835             | 2.001     | 2.018        | 2.022              |
| Mg-ND                                  | 2.101             | 1.821             | 2.132     | 2.149        | 2.167              |
| A,B,C,Mg                               | 0.007             | 0.123             | 0.027     | 0.008        | 0.385              |
| NA-NB                                  | 2.943             | 3.019             | 2.917     | 2.941        | 2.922              |
| NA-NC                                  | 4.058             | 4.112             | 4.020     | 4.048        | 4.011              |
| NA-ND                                  | 2.956             | 2.897             | 2.946     | 2.986        | 2.954              |
| NB-NC                                  | 2.812             | 2.745             | 2.837     | 2.826        | 2.782              |
| NB-ND                                  | 4.189             | 4.209             | 4.208     | 4.221        | 4.191              |
| NC-ND                                  | 2.955             | 3.101             | 2.942     | 2.945        | 2.946              |

a) 1 is C1; NA is nitrogen in ring A; A,B,C,Mg is the distance between plane NA-NB-NC and the Mg-atom.

b) From ref. 40.

c) From ref. 84.

**Table 5S:** Calculated heavy atom distances in Chl *b*.

| Chl <i>b</i><br>distance <sup>a)</sup> | PM5 <sup>b)</sup> | PM3 <sup>b)</sup> | HF/6-31G* | B3LYP/6-31G* | exp. <sup>c)</sup> |
|----------------------------------------|-------------------|-------------------|-----------|--------------|--------------------|
| 1-2                                    | 1.492             | 1.470             | 1.476     | 1.454        | 1.451              |
| 2-3                                    | 1.356             | 1.373             | 1.343     | 1.381        | 1.344              |
| 3-4                                    | 1.489             | 1.478             | 1.476     | 1.463        | 1.475              |
| 4-5                                    | 1.341             | 1.355             | 1.344     | 1.385        | 1.368              |
| 5-6                                    | 1.438             | 1.436             | 1.453     | 1.418        | 1.418              |
| 6-7                                    | 1.449             | 1.454             | 1.431     | 1.450        | 1.463              |
| 7-8                                    | 1.400             | 1.388             | 1.390     | 1.394        | 1.360              |
| 8-9                                    | 1.430             | 1.444             | 1.411     | 1.439        | 1.461              |
| 9-10                                   | 1.400             | 1.402             | 1.405     | 1.409        | 1.378              |
| 10-11                                  | 1.367             | 1.384             | 1.378     | 1.394        | 1.414              |
| 11-12                                  | 1.467             | 1.461             | 1.436     | 1.454        | 1.419              |
| 12-13                                  | 1.374             | 1.384             | 1.378     | 1.388        | 1.406              |
| 13-14                                  | 1.464             | 1.450             | 1.408     | 1.421        | 1.417              |
| 13-13 <sup>1</sup>                     | 1.442             | 1.465             | 1.460     | 1.462        | 1.429              |
| 13 <sup>1</sup> -13 <sup>2</sup>       | 1.582             | 1.567             | 1.564     | 1.584        | 1.569              |
| 13 <sup>2</sup> -15                    | 1.518             | 1.524             | 1.537     | 1.536        | 1.534              |
| 14-15                                  | 1.433             | 1.422             | 1.436     | 1.416        | 1.396              |
| 15-16                                  | 1.348             | 1.368             | 1.348     | 1.380        | 1.364              |
| 16-17                                  | 1.520             | 1.525             | 1.518     | 1.522        | 1.523              |
| 17-18                                  | 1.562             | 1.556             | 1.542     | 1.550        | 1.555              |
| 18-19                                  | 1.529             | 1.519             | 1.521     | 1.525        | 1.525              |
| 19-20                                  | 1.378             | 1.359             | 1.387     | 1.390        | 1.382              |
| 20-1                                   | 1.396             | 1.436             | 1.403     | 1.411        | 1.388              |
| NA-1                                   | 1.355             | 1.347             | 1.325     | 1.362        | 1.377              |
| NA-4                                   | 1.427             | 1.449             | 1.388     | 1.383        | 1.385              |
| NB-6                                   | 1.358             | 1.365             | 1.321     | 1.359        | 1.361              |
| NB-9                                   | 1.418             | 1.424             | 1.384     | 1.385        | 1.389              |
| NC-11                                  | 1.431             | 1.440             | 1.394     | 1.396        | 1.403              |
| NC-14                                  | 1.325             | 1.341             | 1.302     | 1.334        | 1.347              |
| ND-16                                  | 1.416             | 1.384             | 1.385     | 1.379        | 1.388              |
| ND-19                                  | 1.367             | 1.411             | 1.331     | 1.358        | 1.349              |
| Mg-NA                                  | 2.028             | 2.380             | 2.014     | 2.026        | 2.063              |
| Mg-NB                                  | 2.089             | 2.431             | 2.082     | 2.082        | 2.093              |
| Mg-NC                                  | 2.032             | 1.836             | 2.010     | 2.019        | 2.022              |
| Mg-ND                                  | 2.101             | 1.821             | 2.124     | 2.146        | 2.167              |
| A,B,C,Mg                               | 0.010             | 0.111             | 0.019     | 0.012        | 0.385              |
| NA-NB                                  | 2.948             | 3.006             | 2.934     | 2.944        | 2.922              |
| NA-NC                                  | 4.059             | 4.119             | 4.023     | 4.045        | 4.011              |
| NA-ND                                  | 2.956             | 2.916             | 2.944     | 2.981        | 2.954              |
| NB-NC                                  | 2.816             | 2.749             | 2.840     | 2.834        | 2.782              |
| NB-ND                                  | 4.189             | 4.201             | 4.205     | 4.227        | 4.191              |
| NC-ND                                  | 2.948             | 3.093             | 2.923     | 2.945        | 2.946              |

a) 1 is C1; NA is nitrogen in ring A; A,B,C,Mg is the distance between plane NA-NB-NC and the Mg-atom.

b) From ref. 40.

c) From ref. 84.

**Table 6S:** Calculated heavy atom distances in Chl  $c_1$ .

| Chl $c_1$<br>distance <sup>a)</sup> | PM5 <sup>b)</sup> | PM3 <sup>b)</sup> | HF/6-31G* | B3LYP/6-31G* | exp. <sup>c)</sup> |
|-------------------------------------|-------------------|-------------------|-----------|--------------|--------------------|
| 1-2                                 | 1.495             | 1.464             | 1.475     | 1.451        | 1.451              |
| 2-3                                 | 1.354             | 1.377             | 1.340     | 1.380        | 1.344              |
| 3-4                                 | 1.493             | 1.473             | 1.483     | 1.464        | 1.475              |
| 4-5                                 | 1.347             | 1.364             | 1.361     | 1.400        | 1.368              |
| 5-6                                 | 1.432             | 1.427             | 1.431     | 1.403        | 1.418              |
| 6-7                                 | 1.467             | 1.456             | 1.460     | 1.458        | 1.463              |
| 7-8                                 | 1.369             | 1.380             | 1.351     | 1.372        | 1.360              |
| 8-9                                 | 1.467             | 1.452             | 1.459     | 1.459        | 1.461              |
| 9-10                                | 1.364             | 1.399             | 1.359     | 1.399        | 1.378              |
| 10-11                               | 1.404             | 1.388             | 1.429     | 1.405        | 1.414              |
| 11-12                               | 1.442             | 1.460             | 1.408     | 1.456        | 1.419              |
| 12-13                               | 1.392             | 1.384             | 1.398     | 1.385        | 1.406              |
| 13-14                               | 1.444             | 1.453             | 1.388     | 1.422        | 1.417              |
| 13-13 <sup>1</sup>                  | 1.436             | 1.464             | 1.453     | 1.460        | 1.429              |
| 13 <sup>1</sup> -13 <sup>2</sup>    | 1.588             | 1.570             | 1.569     | 1.590        | 1.569              |
| 13 <sup>2</sup> -15                 | 1.519             | 1.520             | 1.534     | 1.533        | 1.534              |
| 14-15                               | 1.435             | 1.425             | 1.434     | 1.404        | 1.396              |
| 15-16                               | 1.343             | 1.373             | 1.357     | 1.405        | 1.364              |
| 16-17                               | 1.481             | 1.491             | 1.465     | 1.461        | 1.523              |
| 17-18                               | 1.355             | 1.371             | 1.349     | 1.386        | 1.555              |
| 18-19                               | 1.493             | 1.481             | 1.466     | 1.449        | 1.525              |
| 19-20                               | 1.396             | 1.365             | 1.421     | 1.406        | 1.382              |
| 20-1                                | 1.378             | 1.432             | 1.371     | 1.398        | 1.388              |
| NA-1                                | 1.373             | 1.355             | 1.351     | 1.372        | 1.377              |
| NA-4                                | 1.414             | 1.439             | 1.364     | 1.369        | 1.385              |
| NB-6                                | 1.351             | 1.373             | 1.316     | 1.367        | 1.361              |
| NB-9                                | 1.428             | 1.414             | 1.390     | 1.376        | 1.389              |
| NC-11                               | 1.412             | 1.432             | 1.369     | 1.382        | 1.403              |
| NC-14                               | 1.339             | 1.345             | 1.320     | 1.344        | 1.347              |
| ND-16                               | 1.437             | 1.397             | 1.396     | 1.380        | 1.388              |
| ND-19                               | 1.360             | 1.412             | 1.319     | 1.371        | 1.349              |
| Mg-NA                               | 2.026             | 2.370             | 2.018     | 2.036        | 2.063              |
| Mg-NB                               | 2.080             | 2.416             | 2.071     | 2.075        | 2.093              |
| Mg-NC                               | 2.032             | 1.831             | 2.007     | 2.020        | 2.022              |
| Mg-ND                               | 2.085             | 1.813             | 2.100     | 2.104        | 2.167              |
| A,B,C,Mg                            | 0.005             | 0.098             | 0.002     | 0.001        | 0.385              |
| NA-NB                               | 2.941             | 3.008             | 2.905     | 2.929        | 2.922              |
| NA-NC                               | 4.057             | 4.124             | 4.024     | 4.055        | 4.011              |
| NA-ND                               | 2.926             | 2.948             | 2.946     | 2.983        | 2.954              |
| NB-NC                               | 2.816             | 2.781             | 2.835     | 2.826        | 2.782              |
| NB-ND                               | 4.165             | 4.194             | 4.170     | 4.178        | 4.191              |
| NC-ND                               | 2.944             | 3.026             | 2.906     | 2.908        | 2.946              |

a) 1 is C1; NA is nitrogen in ring A; A,B,C,Mg is the distance between plane NA-NB-NC and the Mg-atom.

b) From ref. 40.

c) From ref. 84.

**Table 7S:** Calculated heavy atom distances in Chl  $c_2$ .

| Chl $c_2$<br>distance <sup>a)</sup> | PM5 <sup>b)</sup> | PM3 <sup>b)</sup> | HF/6-31G* | B3LYP/6-31G* | exp. <sup>c)</sup> |
|-------------------------------------|-------------------|-------------------|-----------|--------------|--------------------|
| 1-2                                 | 1.494             | 1.471             | 1.475     | 1.452        | 1.451              |
| 2-3                                 | 1.356             | 1.375             | 1.341     | 1.380        | 1.344              |
| 3-4                                 | 1.492             | 1.476             | 1.482     | 1.464        | 1.475              |
| 4-5                                 | 1.346             | 1.363             | 1.360     | 1.399        | 1.368              |
| 5-6                                 | 1.432             | 1.426             | 1.433     | 1.405        | 1.418              |
| 6-7                                 | 1.461             | 1.451             | 1.453     | 1.451        | 1.463              |
| 7-8                                 | 1.375             | 1.384             | 1.355     | 1.379        | 1.360              |
| 8-9                                 | 1.461             | 1.452             | 1.457     | 1.464        | 1.461              |
| 9-10                                | 1.370             | 1.402             | 1.363     | 1.401        | 1.378              |
| 10-11                               | 1.398             | 1.387             | 1.424     | 1.404        | 1.414              |
| 11-12                               | 1.445             | 1.462             | 1.410     | 1.456        | 1.419              |
| 12-13                               | 1.389             | 1.383             | 1.397     | 1.385        | 1.406              |
| 13-14                               | 1.448             | 1.453             | 1.390     | 1.423        | 1.417              |
| 13-13 <sup>1</sup>                  | 1.438             | 1.464             | 1.452     | 1.460        | 1.429              |
| 13 <sup>1</sup> -13 <sup>2</sup>    | 1.587             | 1.569             | 1.570     | 1.591        | 1.569              |
| 13 <sup>2</sup> -15                 | 1.518             | 1.521             | 1.535     | 1.533        | 1.534              |
| 14-15                               | 1.436             | 1.425             | 1.434     | 1.404        | 1.396              |
| 15-16                               | 1.342             | 1.374             | 1.355     | 1.404        | 1.364              |
| 16-17                               | 1.481             | 1.494             | 1.467     | 1.461        | 1.523              |
| 17-18                               | 1.355             | 1.373             | 1.348     | 1.384        | 1.555              |
| 18-19                               | 1.495             | 1.481             | 1.467     | 1.449        | 1.525              |
| 19-20                               | 1.392             | 1.366             | 1.418     | 1.405        | 1.382              |
| 20-1                                | 1.383             | 1.432             | 1.374     | 1.397        | 1.388              |
| NA-1                                | 1.369             | 1.355             | 1.348     | 1.372        | 1.377              |
| NA-4                                | 1.417             | 1.431             | 1.366     | 1.370        | 1.385              |
| NB-6                                | 1.355             | 1.376             | 1.318     | 1.369        | 1.361              |
| NB-9                                | 1.422             | 1.415             | 1.387     | 1.375        | 1.389              |
| NC-11                               | 1.415             | 1.432             | 1.372     | 1.383        | 1.403              |
| NC-14                               | 1.336             | 1.344             | 1.318     | 1.343        | 1.347              |
| ND-16                               | 1.435             | 1.396             | 1.396     | 1.381        | 1.388              |
| ND-19                               | 1.363             | 1.412             | 1.320     | 1.371        | 1.349              |
| Mg-NA                               | 2.027             | 2.360             | 2.018     | 2.035        | 2.063              |
| Mg-NB                               | 2.079             | 2.423             | 2.075     | 2.079        | 2.093              |
| Mg-NC                               | 2.033             | 1.829             | 2.007     | 2.018        | 2.022              |
| Mg-ND                               | 2.083             | 1.814             | 2.099     | 2.106        | 2.167              |
| A,B,C,Mg                            | 0.016             | 0.093             | 0.014     | 0.007        | 0.385              |
| NA-NB                               | 2.943             | 3.030             | 2.909     | 2.935        | 2.922              |
| NA-NC                               | 4.059             | 4.115             | 4.025     | 4.053        | 4.011              |
| NA-ND                               | 2.926             | 2.929             | 2.946     | 2.982        | 2.954              |
| NB-NC                               | 2.816             | 2.777             | 2.836     | 2.827        | 2.782              |
| NB-ND                               | 4.162             | 4.205             | 4.172     | 4.183        | 4.191              |
| NC-ND                               | 2.941             | 3.029             | 2.904     | 2.907        | 2.946              |

a) 1 is C1; NA is nitrogen in ring A; A,B,C,Mg is the distance between plane NA-NB-NC and the Mg-atom.

b) From ref. 40.

c) From ref. 84.

**Table 8S:** Calculated heavy atom distances in Chl  $c_3$ .

| Chl $c_3$<br>distance <sup>a)</sup> | PM5 <sup>b)</sup> | PM3 <sup>b)</sup> | HF/6-31G* | B3LYP/6-31G* | exp. <sup>c)</sup> |
|-------------------------------------|-------------------|-------------------|-----------|--------------|--------------------|
| 1-2                                 | 1.488             | 1.472             | 1.471     | 1.453        | 1.451              |
| 2-3                                 | 1.359             | 1.375             | 1.344     | 1.379        | 1.344              |
| 3-4                                 | 1.489             | 1.477             | 1.478     | 1.468        | 1.475              |
| 4-5                                 | 1.342             | 1.359             | 1.351     | 1.395        | 1.368              |
| 5-6                                 | 1.438             | 1.433             | 1.446     | 1.411        | 1.418              |
| 6-7                                 | 1.446             | 1.449             | 1.438     | 1.453        | 1.463              |
| 7-8                                 | 1.400             | 1.394             | 1.383     | 1.392        | 1.360              |
| 8-9                                 | 1.430             | 1.443             | 1.425     | 1.455        | 1.461              |
| 9-10                                | 1.406             | 1.408             | 1.393     | 1.404        | 1.378              |
| 10-11                               | 1.363             | 1.382             | 1.390     | 1.398        | 1.414              |
| 11-12                               | 1.474             | 1.466             | 1.428     | 1.457        | 1.419              |
| 12-13                               | 1.371             | 1.381             | 1.383     | 1.384        | 1.406              |
| 13-14                               | 1.464             | 1.456             | 1.402     | 1.424        | 1.417              |
| 13-13 <sup>1</sup>                  | 1.444             | 1.464             | 1.456     | 1.460        | 1.429              |
| 13 <sup>1</sup> -13 <sup>2</sup>    | 1.581             | 1.569             | 1.570     | 1.590        | 1.569              |
| 13 <sup>2</sup> -15                 | 1.516             | 1.521             | 1.536     | 1.533        | 1.534              |
| 14-15                               | 1.431             | 1.426             | 1.437     | 1.407        | 1.396              |
| 15-16                               | 1.349             | 1.375             | 1.354     | 1.401        | 1.364              |
| 16-17                               | 1.487             | 1.495             | 1.477     | 1.464        | 1.523              |
| 17-18                               | 1.352             | 1.372             | 1.343     | 1.383        | 1.555              |
| 18-19                               | 1.499             | 1.482             | 1.477     | 1.452        | 1.525              |
| 19-20                               | 1.369             | 1.364             | 1.394     | 1.404        | 1.382              |
| 20-1                                | 1.406             | 1.434             | 1.396     | 1.399        | 1.388              |
| NA-1                                | 1.352             | 1.352             | 1.331     | 1.369        | 1.377              |
| NA-4                                | 1.428             | 1.435             | 1.380     | 1.372        | 1.385              |
| NB-6                                | 1.363             | 1.370             | 1.322     | 1.364        | 1.361              |
| NB-9                                | 1.411             | 1.418             | 1.380     | 1.377        | 1.389              |
| NC-11                               | 1.431             | 1.436             | 1.383     | 1.385        | 1.403              |
| NC-14                               | 1.326             | 1.342             | 1.308     | 1.342        | 1.347              |
| ND-16                               | 1.419             | 1.395             | 1.390     | 1.381        | 1.388              |
| ND-19                               | 1.384             | 1.415             | 1.333     | 1.370        | 1.349              |
| Mg-NA                               | 2.029             | 2.361             | 2.015     | 2.030        | 2.063              |
| Mg-NB                               | 2.082             | 2.424             | 2.085     | 2.089        | 2.093              |
| Mg-NC                               | 2.037             | 1.829             | 2.009     | 2.019        | 2.022              |
| Mg-ND                               | 2.079             | 1.814             | 2.089     | 2.106        | 2.167              |
| A,B,C,Mg                            | 0.014             | 0.095             | 0.012     | 0.013        | 0.385              |
| NA-NB                               | 2.956             | 3.036             | 2.925     | 2.938        | 2.922              |
| NA-NC                               | 4.065             | 4.117             | 4.024     | 4.048        | 4.011              |
| NA-ND                               | 2.929             | 2.925             | 2.937     | 2.977        | 2.954              |
| NB-NC                               | 2.826             | 2.776             | 2.848     | 2.839        | 2.782              |
| NB-ND                               | 4.159             | 4.206             | 4.173     | 4.193        | 4.191              |
| NC-ND                               | 2.920             | 3.029             | 2.886     | 2.905        | 2.946              |

a) 1 is C1; NA is nitrogen in ring A; A,B,C,Mg is the distance between plane NA-NB-NC and the Mg-atom.

b) From ref. 40.

c) From ref. 84.



**Table 9S:** Calculated heavy atom distances in Chl *d*.

| Chl <i>d</i><br>distance <sup>a)</sup> | PM5 <sup>b)</sup> | PM3 <sup>b)</sup> | HF/6-31G* | B3LYP/6-31G* | exp. <sup>c)</sup> |
|----------------------------------------|-------------------|-------------------|-----------|--------------|--------------------|
| 1-2                                    | 1.497             | 1.474             | 1.484     | 1.446        | 1.451              |
| 2-3                                    | 1.363             | 1.371             | 1.343     | 1.387        | 1.344              |
| 3-4                                    | 1.487             | 1.471             | 1.477     | 1.457        | 1.475              |
| 4-5                                    | 1.343             | 1.359             | 1.352     | 1.397        | 1.368              |
| 5-6                                    | 1.434             | 1.428             | 1.445     | 1.408        | 1.418              |
| 6-7                                    | 1.455             | 1.451             | 1.445     | 1.451        | 1.463              |
| 7-8                                    | 1.377             | 1.381             | 1.360     | 1.377        | 1.360              |
| 8-9                                    | 1.455             | 1.450             | 1.446     | 1.453        | 1.461              |
| 9-10                                   | 1.378             | 1.400             | 1.370     | 1.407        | 1.378              |
| 10-11                                  | 1.387             | 1.387             | 1.414     | 1.397        | 1.414              |
| 11-12                                  | 1.449             | 1.459             | 1.408     | 1.455        | 1.419              |
| 12-13                                  | 1.385             | 1.385             | 1.402     | 1.388        | 1.406              |
| 13-14                                  | 1.451             | 1.449             | 1.389     | 1.422        | 1.417              |
| 13-13 <sup>1</sup>                     | 1.437             | 1.464             | 1.453     | 1.463        | 1.429              |
| 13 <sup>1</sup> -13 <sup>2</sup>       | 1.583             | 1.568             | 1.565     | 1.583        | 1.569              |
| 13 <sup>2</sup> -15                    | 1.520             | 1.526             | 1.535     | 1.536        | 1.534              |
| 14-15                                  | 1.436             | 1.421             | 1.443     | 1.411        | 1.396              |
| 15-16                                  | 1.343             | 1.368             | 1.338     | 1.384        | 1.364              |
| 16-17                                  | 1.518             | 1.526             | 1.519     | 1.523        | 1.523              |
| 17-18                                  | 1.560             | 1.556             | 1.543     | 1.551        | 1.555              |
| 18-19                                  | 1.529             | 1.518             | 1.520     | 1.526        | 1.525              |
| 19-20                                  | 1.390             | 1.360             | 1.411     | 1.387        | 1.382              |
| 20-1                                   | 1.384             | 1.434             | 1.379     | 1.412        | 1.388              |
| NA-1                                   | 1.363             | 1.350             | 1.339     | 1.367        | 1.377              |
| NA-4                                   | 1.422             | 1.439             | 1.377     | 1.376        | 1.385              |
| NB-6                                   | 1.357             | 1.372             | 1.315     | 1.367        | 1.361              |
| NB-9                                   | 1.419             | 1.420             | 1.389     | 1.375        | 1.389              |
| NC-11                                  | 1.423             | 1.436             | 1.385     | 1.393        | 1.403              |
| NC-14                                  | 1.331             | 1.342             | 1.311     | 1.337        | 1.347              |
| ND-16                                  | 1.425             | 1.385             | 1.404     | 1.374        | 1.388              |
| ND-19                                  | 1.353             | 1.411             | 1.308     | 1.361        | 1.349              |
| Mg-NA                                  | 2.033             | 2.372             | 2.025     | 2.034        | 2.063              |
| Mg-NB                                  | 2.086             | 2.435             | 2.072     | 2.072        | 2.093              |
| Mg-NC                                  | 2.031             | 1.834             | 2.000     | 2.018        | 2.022              |
| Mg-ND                                  | 2.104             | 1.821             | 2.137     | 2.151        | 2.167              |
| A,B,C,Mg                               | 0.012             | 0.118             | 0.032     | 0.009        | 0.385              |
| NA-NB                                  | 2.942             | 3.019             | 2.917     | 2.941        | 2.922              |
| NA-NC                                  | 4.062             | 4.114             | 4.025     | 4.052        | 4.011              |
| NA-ND                                  | 2.962             | 2.902             | 2.956     | 2.995        | 2.954              |
| NB-NC                                  | 2.812             | 2.744             | 2.835     | 2.825        | 2.782              |
| NB-ND                                  | 4.189             | 4.207             | 4.209     | 4.222        | 4.191              |
| NC-ND                                  | 2.956             | 3.097             | 2.941     | 2.946        | 2.946              |

a) 1 is C1; NA is nitrogen in ring A; A,B,C,Mg is the distance between plane NA-NB-NC and the Mg-atom.

b) From ref. 40.

c) From ref. 84.

**Table 10S:** Calculated heavy atom distances in Bchl *a*.

| <b>Bchl <i>a</i><br/>distance<sup>a)</sup></b> | <b>PM5<sup>b)</sup></b> | <b>PM3<sup>b)</sup></b> | <b>HF/6-31G<sup>*c)</sup></b> | <b>B3LYP/6-31G<sup>*c)</sup></b> | <b>exp.<sup>d)</sup></b> |
|------------------------------------------------|-------------------------|-------------------------|-------------------------------|----------------------------------|--------------------------|
| <b>1-2</b>                                     | 1.412                   | 1.423                   | 1.487                         | 1.443                            | 1.451                    |
| <b>2-3</b>                                     | 1.418                   | 1.407                   | 1.338                         | 1.396                            | 1.344                    |
| <b>3-4</b>                                     | 1.427                   | 1.438                   | 1.487                         | 1.456                            | 1.475                    |
| <b>4-5</b>                                     | 1.434                   | 1.432                   | 1.355                         | 1.408                            | 1.368                    |
| <b>5-6</b>                                     | 1.339                   | 1.354                   | 1.438                         | 1.390                            | 1.418                    |
| <b>6-7</b>                                     | 1.528                   | 1.517                   | 1.517                         | 1.524                            | 1.463                    |
| <b>7-8</b>                                     | 1.557                   | 1.548                   | 1.541                         | 1.550                            | 1.360                    |
| <b>8-9</b>                                     | 1.527                   | 1.517                   | 1.522                         | 1.527                            | 1.461                    |
| <b>9-10</b>                                    | 1.436                   | 1.446                   | 1.335                         | 1.388                            | 1.378                    |
| <b>10-11</b>                                   | 1.346                   | 1.355                   | 1.454                         | 1.410                            | 1.414                    |
| <b>11-12</b>                                   | 1.518                   | 1.495                   | 1.385                         | 1.447                            | 1.419                    |
| <b>12-13</b>                                   | 1.346                   | 1.363                   | 1.423                         | 1.392                            | 1.406                    |
| <b>13-14</b>                                   | 1.491                   | 1.475                   | 1.373                         | 1.417                            | 1.417                    |
| <b>13-13<sup>1</sup></b>                       | 1.459                   | 1.473                   | 1.447                         | 1.461                            | 1.429                    |
| <b>13<sup>1</sup>-13<sup>2</sup></b>           | 1.576                   | 1.564                   | 1.565                         | 1.584                            | 1.569                    |
| <b>13<sup>2</sup>-15</b>                       | 1.515                   | 1.523                   | 1.532                         | 1.534                            | 1.534                    |
| <b>14-15</b>                                   | 1.371                   | 1.388                   | 1.447                         | 1.407                            | 1.396                    |
| <b>15-16</b>                                   | 1.411                   | 1.402                   | 1.334                         | 1.386                            | 1.364                    |
| <b>16-17</b>                                   | 1.521                   | 1.527                   | 1.518                         | 1.523                            | 1.523                    |
| <b>17-18</b>                                   | 1.560                   | 1.557                   | 1.543                         | 1.550                            | 1.555                    |
| <b>18-19</b>                                   | 1.526                   | 1.516                   | 1.519                         | 1.527                            | 1.525                    |
| <b>19-20</b>                                   | 1.338                   | 1.356                   | 1.430                         | 1.388                            | 1.382                    |
| <b>20-1</b>                                    | 1.432                   | 1.430                   | 1.363                         | 1.410                            | 1.388                    |
| <b>NA-1</b>                                    | 1.394                   | 1.400                   | 1.352                         | 1.374                            | 1.377                    |
| <b>NA-4</b>                                    | 1.376                   | 1.380                   | 1.367                         | 1.370                            | 1.385                    |
| <b>NB-6</b>                                    | 1.432                   | 1.438                   | 1.290                         | 1.357                            | 1.361                    |
| <b>NB-9</b>                                    | 1.326                   | 1.336                   | 1.418                         | 1.369                            | 1.389                    |
| <b>NC-11</b>                                   | 1.412                   | 1.445                   | 1.381                         | 1.386                            | 1.403                    |
| <b>NC-14</b>                                   | 1.358                   | 1.353                   | 1.324                         | 1.345                            | 1.347                    |
| <b>ND-16</b>                                   | 1.340                   | 1.346                   | 1.416                         | 1.371                            | 1.388                    |
| <b>ND-19</b>                                   | 1.429                   | 1.431                   | 1.294                         | 1.359                            | 1.349                    |
| <b>Mg-NA</b>                                   | 2.020                   | 2.325                   | 2.031                         | 2.036                            | 2.063                    |
| <b>Mg-NB</b>                                   | 2.123                   | 2.467                   | 2.115                         | 2.121                            | 2.093                    |
| <b>Mg-NC</b>                                   | 2.040                   | 1.830                   | 1.988                         | 2.017                            | 2.022                    |
| <b>Mg-ND</b>                                   | 2.113                   | 1.829                   | 2.149                         | 2.154                            | 2.167                    |
| <b>A,B,C,Mg</b>                                | 0.029                   | 0.096                   | 0.087                         | 0.024                            | 0.385                    |
| <b>NA-NB</b>                                   | 2.992                   | 3.052                   | 2.935                         | 2.984                            | 2.922                    |
| <b>NA-NC</b>                                   | 4.058                   | 4.067                   | 4.015                         | 4.053                            | 4.011                    |
| <b>NA-ND</b>                                   | 3.021                   | 2.928                   | 2.954                         | 3.002                            | 2.954                    |
| <b>NB-NC</b>                                   | 2.786                   | 2.732                   | 2.868                         | 2.846                            | 2.782                    |
| <b>NB-ND</b>                                   | 4.229                   | 4.268                   | 4.263                         | 4.273                            | 4.191                    |
| <b>NC-ND</b>                                   | 2.928                   | 3.074                   | 2.963                         | 2.950                            | 2.946                    |

a) 1 is C1; NA is nitrogen in ring A; A,B,C,Mg is the distance between plane NA-NB-NC and the Mg-atom.

b) From ref. 40.

c) From ref. 41.

d) From ref. 84.

**Table 11S:** Calculated heavy atom distances in Bchl *b*.

| Bchl <i>b</i><br>distance <sup>a)</sup> | PM5 <sup>b)</sup> | PM3 <sup>b)</sup> | HF/6-31G <sup>*c)</sup> | B3LYP/6-31G <sup>*c)</sup> | exp. <sup>d)</sup> |
|-----------------------------------------|-------------------|-------------------|-------------------------|----------------------------|--------------------|
| 1-2                                     | 1.503             | 1.484             | 1.487                   | 1.444                      | 1.451              |
| 2-3                                     | 1.350             | 1.364             | 1.335                   | 1.396                      | 1.344              |
| 3-4                                     | 1.493             | 1.478             | 1.483                   | 1.458                      | 1.475              |
| 4-5                                     | 1.350             | 1.353             | 1.355                   | 1.404                      | 1.368              |
| 5-6                                     | 1.429             | 1.443             | 1.438                   | 1.393                      | 1.418              |
| 6-7                                     | 1.532             | 1.526             | 1.514                   | 1.521                      | 1.463              |
| 7-8                                     | 1.518             | 1.509             | 1.518                   | 1.524                      | 1.360              |
| 8-9                                     | 1.483             | 1.471             | 1.483                   | 1.476                      | 1.461              |
| 9-10                                    | 1.346             | 1.363             | 1.342                   | 1.396                      | 1.378              |
| 10-11                                   | 1.425             | 1.424             | 1.448                   | 1.406                      | 1.414              |
| 11-12                                   | 1.422             | 1.430             | 1.388                   | 1.448                      | 1.419              |
| 12-13                                   | 1.406             | 1.407             | 1.420                   | 1.392                      | 1.406              |
| 13-14                                   | 1.433             | 1.428             | 1.375                   | 1.418                      | 1.417              |
| 13-13 <sup>1</sup>                      | 1.430             | 1.459             | 1.448                   | 1.460                      | 1.429              |
| 13 <sup>1</sup> -13 <sup>2</sup>        | 1.589             | 1.572             | 1.565                   | 1.583                      | 1.569              |
| 13 <sup>2</sup> -15                     | 1.522             | 1.525             | 1.532                   | 1.535                      | 1.534              |
| 14-15                                   | 1.438             | 1.430             | 1.447                   | 1.408                      | 1.396              |
| 15-16                                   | 1.337             | 1.357             | 1.333                   | 1.384                      | 1.364              |
| 16-17                                   | 1.518             | 1.523             | 1.518                   | 1.523                      | 1.523              |
| 17-18                                   | 1.561             | 1.556             | 1.542                   | 1.551                      | 1.555              |
| 18-19                                   | 1.529             | 1.521             | 1.518                   | 1.527                      | 1.525              |
| 19-20                                   | 1.416             | 1.374             | 1.430                   | 1.388                      | 1.382              |
| 20-1                                    | 1.360             | 1.420             | 1.363                   | 1.409                      | 1.388              |
| NA-1                                    | 1.384             | 1.354             | 1.354                   | 1.373                      | 1.377              |
| NA-4                                    | 1.403             | 1.445             | 1.365                   | 1.371                      | 1.385              |
| NB-6                                    | 1.326             | 1.330             | 1.289                   | 1.352                      | 1.361              |
| NB-9                                    | 1.442             | 1.453             | 1.423                   | 1.383                      | 1.389              |
| NC-11                                   | 1.407             | 1.418             | 1.381                   | 1.387                      | 1.403              |
| NC-14                                   | 1.346             | 1.356             | 1.323                   | 1.343                      | 1.347              |
| ND-16                                   | 1.441             | 1.403             | 1.416                   | 1.372                      | 1.388              |
| ND-19                                   | 1.334             | 1.388             | 1.294                   | 1.358                      | 1.349              |
| Mg-NA                                   | 2.032             | 2.372             | 2.025                   | 2.035                      | 2.063              |
| Mg-NB                                   | 2.110             | 2.454             | 2.123                   | 2.127                      | 2.093              |
| Mg-NC                                   | 2.015             | 1.832             | 1.985                   | 2.014                      | 2.022              |
| Mg-ND                                   | 2.121             | 1.821             | 2.154                   | 2.160                      | 2.167              |
| A,B,C,Mg                                | 0.013             | 0.134             | 0.081                   | 0.012                      | 0.385              |
| NA-NB                                   | 2.947             | 3.026             | 2.946                   | 2.998                      | 2.922              |
| NA-NC                                   | 4.046             | 4.116             | 4.007                   | 4.049                      | 4.011              |
| NA-ND                                   | 2.951             | 2.893             | 2.947                   | 2.997                      | 2.954              |
| NB-NC                                   | 2.833             | 2.769             | 2.872                   | 2.851                      | 2.782              |
| NB-ND                                   | 4.231             | 4.226             | 4.277                   | 4.285                      | 4.191              |
| NC-ND                                   | 2.978             | 3.106             | 2.961                   | 2.945                      | 2.946              |

a) 1 is C1; NA is nitrogen in ring A; A,B,C,Mg is the distance between plane NA-NB-NC and the Mg-atom.

b) From ref. 40.

c) From ref. 41.

d) From ref. 84.

**Table 12S:** Calculated heavy atom distances in Bchl *c*.

| Bchl <i>c</i><br>distance <sup>a)</sup> | PM5 <sup>b)</sup> | PM3 <sup>b)</sup> | HF/6-31G* | B3LYP/6-31G* | exp. <sup>c)</sup> |
|-----------------------------------------|-------------------|-------------------|-----------|--------------|--------------------|
| 1-2                                     | 1.497             | 1.477             | 1.501     | 1.468        | 1.451              |
| 2-3                                     | 1.358             | 1.372             | 1.340     | 1.379        | 1.344              |
| 3-4                                     | 1.480             | 1.467             | 1.470     | 1.447        | 1.475              |
| 4-5                                     | 1.342             | 1.360             | 1.354     | 1.397        | 1.368              |
| 5-6                                     | 1.431             | 1.426             | 1.441     | 1.405        | 1.418              |
| 6-7                                     | 1.445             | 1.452             | 1.443     | 1.449        | 1.463              |
| 7-8                                     | 1.386             | 1.381             | 1.362     | 1.379        | 1.360              |
| 8-9                                     | 1.444             | 1.448             | 1.443     | 1.452        | 1.461              |
| 9-10                                    | 1.397             | 1.400             | 1.373     | 1.405        | 1.378              |
| 10-11                                   | 1.368             | 1.384             | 1.407     | 1.397        | 1.414              |
| 11-12                                   | 1.466             | 1.463             | 1.413     | 1.455        | 1.419              |
| 12-13                                   | 1.376             | 1.385             | 1.396     | 1.388        | 1.406              |
| 13-14                                   | 1.459             | 1.450             | 1.393     | 1.422        | 1.417              |
| 13-13 <sup>1</sup>                      | 1.445             | 1.468             | 1.461     | 1.468        | 1.429              |
| 13 <sup>1</sup> -13 <sup>2</sup>        | 1.562             | 1.552             | 1.554     | 1.570        | 1.569              |
| 13 <sup>2</sup> -15                     | 1.514             | 1.519             | 1.527     | 1.527        | 1.534              |
| 14-15                                   | 1.430             | 1.417             | 1.439     | 1.409        | 1.396              |
| 15-16                                   | 1.343             | 1.365             | 1.337     | 1.381        | 1.364              |
| 16-17                                   | 1.517             | 1.520             | 1.510     | 1.515        | 1.523              |
| 17-18                                   | 1.556             | 1.553             | 1.536     | 1.545        | 1.555              |
| 18-19                                   | 1.536             | 1.525             | 1.533     | 1.538        | 1.525              |
| 19-20                                   | 1.389             | 1.371             | 1.421     | 1.403        | 1.382              |
| 20-1                                    | 1.412             | 1.455             | 1.403     | 1.434        | 1.388              |
| NA-1                                    | 1.357             | 1.353             | 1.345     | 1.369        | 1.377              |
| NA-4                                    | 1.431             | 1.450             | 1.379     | 1.383        | 1.385              |
| NB-6                                    | 1.365             | 1.369             | 1.314     | 1.365        | 1.361              |
| NB-9                                    | 1.409             | 1.417             | 1.386     | 1.377        | 1.389              |
| NC-11                                   | 1.429             | 1.440             | 1.385     | 1.392        | 1.403              |
| NC-14                                   | 1.324             | 1.339             | 1.308     | 1.336        | 1.347              |
| ND-16                                   | 1.416             | 1.386             | 1.404     | 1.377        | 1.388              |
| ND-19                                   | 1.368             | 1.413             | 1.318     | 1.366        | 1.349              |
| Mg-NA                                   | 2.038             | 2.393             | 2.030     | 2.039        | 2.063              |
| Mg-NB                                   | 2.078             | 2.424             | 2.072     | 2.070        | 2.093              |
| Mg-NC                                   | 2.043             | 1.841             | 2.011     | 2.025        | 2.022              |
| Mg-ND                                   | 2.095             | 1.819             | 2.109     | 2.130        | 2.167              |
| A,B,C,Mg                                | 0.053             | 0.059             | 0.006     | 0.017        | 0.385              |
| NA-NB                                   | 2.996             | 3.078             | 2.972     | 2.991        | 2.922              |
| NA-NC                                   | 4.079             | 4.148             | 4.041     | 4.064        | 4.011              |
| NA-ND                                   | 2.915             | 2.869             | 2.896     | 2.936        | 2.954              |
| NB-NC                                   | 2.769             | 2.703             | 2.804     | 2.799        | 2.782              |
| NB-ND                                   | 4.171             | 4.202             | 4.180     | 4.199        | 4.191              |
| NC-ND                                   | 2.986             | 3.144             | 2.955     | 2.961        | 2.946              |

a) 1 is C1; NA is nitrogen in ring A; A,B,C,Mg is the distance between plane NA-NB-NC and the Mg-atom.

b) From ref. 40.

c) From ref. 84.

**Table 13S:** Calculated heavy atom distances in **Bchl d**.

| <b>Bchl <i>d</i><br/>distance<sup>a)</sup></b> | <b>PM5<sup>b)</sup></b> | <b>PM3<sup>b)</sup></b> | <b>HF/6-31G*</b> | <b>B3LYP/6-31G*</b> | <b>exp.<sup>c)</sup></b> |
|------------------------------------------------|-------------------------|-------------------------|------------------|---------------------|--------------------------|
| <b>1-2</b>                                     | 1.497                   | 1.468                   | 1.482            | 1.456               | 1.451                    |
| <b>2-3</b>                                     | 1.353                   | 1.370                   | 1.340            | 1.376               | 1.344                    |
| <b>3-4</b>                                     | 1.492                   | 1.474                   | 1.481            | 1.458               | 1.475                    |
| <b>4-5</b>                                     | 1.344                   | 1.359                   | 1.352            | 1.392               | 1.368                    |
| <b>5-6</b>                                     | 1.435                   | 1.432                   | 1.446            | 1.412               | 1.418                    |
| <b>6-7</b>                                     | 1.458                   | 1.454                   | 1.446            | 1.450               | 1.463                    |
| <b>7-8</b>                                     | 1.374                   | 1.380                   | 1.360            | 1.378               | 1.360                    |
| <b>8-9</b>                                     | 1.459                   | 1.450                   | 1.445            | 1.452               | 1.461                    |
| <b>9-10</b>                                    | 1.377                   | 1.396                   | 1.372            | 1.405               | 1.378                    |
| <b>10-11</b>                                   | 1.389                   | 1.389                   | 1.412            | 1.398               | 1.414                    |
| <b>11-12</b>                                   | 1.449                   | 1.460                   | 1.410            | 1.452               | 1.419                    |
| <b>12-13</b>                                   | 1.386                   | 1.388                   | 1.400            | 1.390               | 1.406                    |
| <b>13-14</b>                                   | 1.450                   | 1.447                   | 1.391            | 1.421               | 1.417                    |
| <b>13-13<sup>1</sup></b>                       | 1.445                   | 1.469                   | 1.459            | 1.468               | 1.429                    |
| <b>13<sup>1</sup>-13<sup>2</sup></b>           | 1.562                   | 1.552                   | 1.554            | 1.569               | 1.569                    |
| <b>13<sup>2</sup>-15</b>                       | 1.515                   | 1.517                   | 1.527            | 1.527               | 1.534                    |
| <b>14-15</b>                                   | 1.438                   | 1.422                   | 1.444            | 1.415               | 1.396                    |
| <b>15-16</b>                                   | 1.339                   | 1.364                   | 1.336            | 1.380               | 1.364                    |
| <b>16-17</b>                                   | 1.518                   | 1.524                   | 1.519            | 1.523               | 1.523                    |
| <b>17-18</b>                                   | 1.561                   | 1.558                   | 1.544            | 1.551               | 1.555                    |
| <b>18-19</b>                                   | 1.530                   | 1.519                   | 1.521            | 1.528               | 1.525                    |
| <b>19-20</b>                                   | 1.393                   | 1.361                   | 1.410            | 1.390               | 1.382                    |
| <b>20-1</b>                                    | 1.382                   | 1.434                   | 1.382            | 1.410               | 1.388                    |
| <b>NA-1</b>                                    | 1.364                   | 1.348                   | 1.339            | 1.361               | 1.377                    |
| <b>NA-4</b>                                    | 1.422                   | 1.451                   | 1.378            | 1.383               | 1.385                    |
| <b>NB-6</b>                                    | 1.354                   | 1.368                   | 1.314            | 1.365               | 1.361                    |
| <b>NB-9</b>                                    | 1.421                   | 1.421                   | 1.388            | 1.378               | 1.389                    |
| <b>NC-11</b>                                   | 1.421                   | 1.436                   | 1.385            | 1.393               | 1.403                    |
| <b>NC-14</b>                                   | 1.332                   | 1.341                   | 1.311            | 1.337               | 1.347                    |
| <b>ND-16</b>                                   | 1.428                   | 1.388                   | 1.404            | 1.378               | 1.388                    |
| <b>ND-19</b>                                   | 1.350                   | 1.405                   | 1.308            | 1.357               | 1.349                    |
| <b>Mg-NA</b>                                   | 2.031                   | 2.377                   | 2.020            | 2.030               | 2.063                    |
| <b>Mg-NB</b>                                   | 2.085                   | 2.426                   | 2.075            | 2.071               | 2.093                    |
| <b>Mg-NC</b>                                   | 2.032                   | 1.837                   | 2.001            | 2.016               | 2.022                    |
| <b>Mg-ND</b>                                   | 2.102                   | 1.817                   | 2.132            | 2.150               | 2.167                    |
| <b>A,B,C,Mg</b>                                | 0.029                   | 0.088                   | 0.032            | 0.012               | 0.385                    |
| <b>NA-NB</b>                                   | 2.939                   | 3.005                   | 2.917            | 2.938               | 2.922                    |
| <b>NA-NC</b>                                   | 4.061                   | 4.123                   | 4.020            | 4.046               | 4.011                    |
| <b>NA-ND</b>                                   | 2.959                   | 2.916                   | 2.951            | 2.987               | 2.954                    |
| <b>NB-NC</b>                                   | 2.800                   | 2.739                   | 2.834            | 2.826               | 2.782                    |
| <b>NB-ND</b>                                   | 4.185                   | 4.202                   | 4.207            | 4.220               | 4.191                    |
| <b>NC-ND</b>                                   | 2.967                   | 3.108                   | 2.938            | 2.943               | 2.946                    |

a) 1 is C1; NA is nitrogen in ring A; A,B,C,Mg is the distance between plane NA-NB-NC and the Mg-atom.

b) From ref. 40.

c) From ref. 84.

**Table 14S:** Calculated heavy atom distances in **Bchl *e***.

| <b>Bchl <i>e</i><br/>distance<sup>a)</sup></b> | <b>PM5<sup>b)</sup></b> | <b>PM3<sup>b)</sup></b> | <b>HF/6-31G*</b> | <b>B3LYP/6-31G*</b> | <b>exp.<sup>c)</sup></b> |
|------------------------------------------------|-------------------------|-------------------------|------------------|---------------------|--------------------------|
| <b>1-2</b>                                     | 1.501                   | 1.478                   | 1.498            | 1.472               | 1.451                    |
| <b>2-3</b>                                     | 1.355                   | 1.371                   | 1.341            | 1.376               | 1.344                    |
| <b>3-4</b>                                     | 1.485                   | 1.469                   | 1.469            | 1.451               | 1.475                    |
| <b>4-5</b>                                     | 1.342                   | 1.358                   | 1.349            | 1.390               | 1.368                    |
| <b>5-6</b>                                     | 1.436                   | 1.431                   | 1.450            | 1.414               | 1.418                    |
| <b>6-7</b>                                     | 1.451                   | 1.453                   | 1.427            | 1.450               | 1.463                    |
| <b>7-8</b>                                     | 1.399                   | 1.389                   | 1.393            | 1.394               | 1.360                    |
| <b>8-9</b>                                     | 1.433                   | 1.441                   | 1.410            | 1.438               | 1.461                    |
| <b>9-10</b>                                    | 1.398                   | 1.406                   | 1.406            | 1.408               | 1.378                    |
| <b>10-11</b>                                   | 1.368                   | 1.379                   | 1.376            | 1.392               | 1.414                    |
| <b>11-12</b>                                   | 1.467                   | 1.467                   | 1.439            | 1.456               | 1.419                    |
| <b>12-13</b>                                   | 1.374                   | 1.382                   | 1.381            | 1.392               | 1.406                    |
| <b>13-14</b>                                   | 1.461                   | 1.452                   | 1.408            | 1.423               | 1.417                    |
| <b>13-13<sup>1</sup></b>                       | 1.452                   | 1.469                   | 1.466            | 1.412               | 1.429                    |
| <b>13<sup>1</sup>-13<sup>2</sup></b>           | 1.558                   | 1.552                   | 1.553            | 1.469               | 1.569                    |
| <b>13<sup>2</sup>-15</b>                       | 1.515                   | 1.519                   | 1.528            | 1.567               | 1.534                    |
| <b>14-15</b>                                   | 1.432                   | 1.417                   | 1.434            | 1.526               | 1.396                    |
| <b>15-16</b>                                   | 1.342                   | 1.366                   | 1.343            | 1.378               | 1.364                    |
| <b>16-17</b>                                   | 1.514                   | 1.520                   | 1.511            | 1.514               | 1.523                    |
| <b>17-18</b>                                   | 1.559                   | 1.553                   | 1.536            | 1.544               | 1.555                    |
| <b>18-19</b>                                   | 1.536                   | 1.525                   | 1.533            | 1.538               | 1.525                    |
| <b>19-20</b>                                   | 1.398                   | 1.371                   | 1.401            | 1.404               | 1.382                    |
| <b>20-1</b>                                    | 1.403                   | 1.455                   | 1.421            | 1.432               | 1.388                    |
| <b>NA-1</b>                                    | 1.363                   | 1.352                   | 1.332            | 1.367               | 1.377                    |
| <b>NA-4</b>                                    | 1.427                   | 1.451                   | 1.387            | 1.384               | 1.385                    |
| <b>NB-6</b>                                    | 1.356                   | 1.366                   | 1.319            | 1.357               | 1.361                    |
| <b>NB-9</b>                                    | 1.419                   | 1.419                   | 1.384            | 1.385               | 1.389                    |
| <b>NC-11</b>                                   | 1.431                   | 1.443                   | 1.394            | 1.395               | 1.403                    |
| <b>NC-14</b>                                   | 1.325                   | 1.337                   | 1.300            | 1.334               | 1.347                    |
| <b>ND-16</b>                                   | 1.423                   | 1.385                   | 1.390            | 1.379               | 1.388                    |
| <b>ND-19</b>                                   | 1.359                   | 1.414                   | 1.335            | 1.364               | 1.349                    |
| <b>Mg-NA</b>                                   | 2.035                   | 2.391                   | 2.030            | 2.038               | 2.063                    |
| <b>Mg-NB</b>                                   | 2.086                   | 2.427                   | 2.073            | 2.077               | 2.093                    |
| <b>Mg-NC</b>                                   | 2.043                   | 1.840                   | 2.017            | 2.027               | 2.022                    |
| <b>Mg-ND</b>                                   | 2.099                   | 1.820                   | 2.100            | 2.127               | 2.167                    |
| <b>A,B,C,Mg</b>                                | 0.076                   | 0.048                   | 0.005            | 0.016               | 0.385                    |
| <b>NA-NB</b>                                   | 2.992                   | 3.081                   | 2.981            | 2.992               | 2.922                    |
| <b>NA-NC</b>                                   | 4.074                   | 4.148                   | 4.047            | 4.065               | 4.011                    |
| <b>NA-ND</b>                                   | 2.919                   | 2.866                   | 2.891            | 2.928               | 2.954                    |
| <b>NB-NC</b>                                   | 2.781                   | 2.708                   | 2.812            | 2.810               | 2.782                    |
| <b>NB-ND</b>                                   | 4.182                   | 4.205                   | 4.173            | 4.203               | 4.191                    |
| <b>NC-ND</b>                                   | 2.983                   | 3.143                   | 2.941            | 2.964               | 2.946                    |

a) 1 is C1; NA is nitrogen in ring A; A,B,C,Mg is the distance between plane NA-NB-NC and the Mg-atom.

b) From ref. 40.

c) From ref. 84.

**Table 15S:** Calculated heavy atom distances in **Bchl f**.

| <b>Bchl f</b><br>distance <sup>a)</sup> | <b>PM5<sup>b)</sup></b> | <b>PM3<sup>b)</sup></b> | <b>HF/6-31G*</b> | <b>B3LYP/6-31G*</b> | <b>exp.<sup>c)</sup></b> |
|-----------------------------------------|-------------------------|-------------------------|------------------|---------------------|--------------------------|
| <b>1-2</b>                              | 1.496                   | 1.469                   | 1.482            | 1.459               | 1.451                    |
| <b>2-3</b>                              | 1.353                   | 1.370                   | 1.340            | 1.374               | 1.344                    |
| <b>3-4</b>                              | 1.492                   | 1.476                   | 1.480            | 1.462               | 1.475                    |
| <b>4-5</b>                              | 1.342                   | 1.357                   | 1.347            | 1.387               | 1.368                    |
| <b>5-6</b>                              | 1.439                   | 1.435                   | 1.453            | 1.419               | 1.418                    |
| <b>6-7</b>                              | 1.451                   | 1.453                   | 1.433            | 1.450               | 1.463                    |
| <b>7-8</b>                              | 1.400                   | 1.388                   | 1.389            | 1.395               | 1.360                    |
| <b>8-9</b>                              | 1.432                   | 1.443                   | 1.414            | 1.437               | 1.461                    |
| <b>9-10</b>                             | 1.400                   | 1.404                   | 1.398            | 1.409               | 1.378                    |
| <b>10-11</b>                            | 1.368                   | 1.383                   | 1.386            | 1.394               | 1.414                    |
| <b>11-12</b>                            | 1.467                   | 1.465                   | 1.431            | 1.456               | 1.419                    |
| <b>12-13</b>                            | 1.373                   | 1.384                   | 1.386            | 1.393               | 1.406                    |
| <b>13-14</b>                            | 1.458                   | 1.451                   | 1.402            | 1.423               | 1.417                    |
| <b>13-13<sup>1</sup></b>                | 1.451                   | 1.471                   | 1.464            | 1.468               | 1.429                    |
| <b>13<sup>1</sup>-13<sup>2</sup></b>    | 1.557                   | 1.552                   | 1.552            | 1.566               | 1.569                    |
| <b>13<sup>2</sup>-15</b>                | 1.513                   | 1.517                   | 1.528            | 1.526               | 1.534                    |
| <b>14-15</b>                            | 1.434                   | 1.422                   | 1.441            | 1.418               | 1.396                    |
| <b>15-16</b>                            | 1.342                   | 1.365                   | 1.340            | 1.377               | 1.364                    |
| <b>16-17</b>                            | 1.519                   | 1.524                   | 1.519            | 1.523               | 1.523                    |
| <b>17-18</b>                            | 1.560                   | 1.558                   | 1.542            | 1.551               | 1.555                    |
| <b>18-19</b>                            | 1.530                   | 1.518                   | 1.521            | 1.527               | 1.525                    |
| <b>19-20</b>                            | 1.386                   | 1.360                   | 1.398            | 1.392               | 1.382                    |
| <b>20-1</b>                             | 1.389                   | 1.435                   | 1.392            | 1.408               | 1.388                    |
| <b>NA-1</b>                             | 1.360                   | 1.347                   | 1.330            | 1.360               | 1.377                    |
| <b>NA-4</b>                             | 1.426                   | 1.452                   | 1.384            | 1.384               | 1.385                    |
| <b>NB-6</b>                             | 1.357                   | 1.367                   | 1.319            | 1.357               | 1.361                    |
| <b>NB-9</b>                             | 1.419                   | 1.421                   | 1.388            | 1.386               | 1.389                    |
| <b>NC-11</b>                            | 1.430                   | 1.440                   | 1.392            | 1.394               | 1.403                    |
| <b>NC-14</b>                            | 1.325                   | 1.339                   | 1.304            | 1.335               | 1.347                    |
| <b>ND-16</b>                            | 1.422                   | 1.387                   | 1.396            | 1.381               | 1.388                    |
| <b>ND-19</b>                            | 1.357                   | 1.407                   | 1.319            | 1.354               | 1.349                    |
| <b>Mg-NA</b>                            | 2.030                   | 2.375                   | 2.018            | 2.028               | 2.063                    |
| <b>Mg-NB</b>                            | 2.083                   | 2.428                   | 2.075            | 2.079               | 2.093                    |
| <b>Mg-NC</b>                            | 2.037                   | 1.836                   | 2.008            | 2.018               | 2.022                    |
| <b>Mg-ND</b>                            | 2.103                   | 1.817                   | 2.127            | 2.147               | 2.167                    |
| <b>A,B,C,Mg</b>                         | 0.035                   | 0.077                   | 0.031            | 0.014               | 0.385                    |
| <b>NA-NB</b>                            | 2.948                   | 3.006                   | 2.925            | 2.938               | 2.922                    |
| <b>NA-NC</b>                            | 4.064                   | 4.122                   | 4.025            | 4.046               | 4.011                    |
| <b>NA-ND</b>                            | 2.955                   | 2.918                   | 2.944            | 2.978               | 2.954                    |
| <b>NB-NC</b>                            | 2.807                   | 2.745                   | 2.841            | 2.839               | 2.782                    |
| <b>NB-ND</b>                            | 4.184                   | 4.205                   | 4.202            | 4.225               | 4.191                    |
| <b>NC-ND</b>                            | 2.958                   | 3.103                   | 2.929            | 2.947               | 2.946                    |

a) 1 is C1; NA is nitrogen in ring A; A,B,C,Mg is the distance between plane NA-NB-NC and the Mg-atom.

b) From ref. 40.

c) From ref. 84.

**Table 16S:** Calculated heavy atom distances in **Bchl g**.

| <b>Bchl f</b><br>distance <sup>a)</sup> | <b>PM5<sup>b)</sup></b> | <b>PM3<sup>b)</sup></b> | <b>HF/6-31G<sup>*c)</sup></b> | <b>B3LYP/6-31G<sup>*c)</sup></b> | <b>exp.<sup>d)</sup></b> |
|-----------------------------------------|-------------------------|-------------------------|-------------------------------|----------------------------------|--------------------------|
| <b>1-2</b>                              | 1.498                   | 1.477                   | 1.484                         | 1.448                            | 1.451                    |
| <b>2-3</b>                              | 1.352                   | 1.370                   | 1.336                         | 1.383                            | 1.344                    |
| <b>3-4</b>                              | 1.496                   | 1.483                   | 1.485                         | 1.460                            | 1.475                    |
| <b>4-5</b>                              | 1.349                   | 1.351                   | 1.356                         | 1.399                            | 1.368                    |
| <b>5-6</b>                              | 1.428                   | 1.444                   | 1.437                         | 1.398                            | 1.418                    |
| <b>6-7</b>                              | 1.529                   | 1.523                   | 1.515                         | 1.521                            | 1.463                    |
| <b>7-8</b>                              | 1.525                   | 1.515                   | 1.518                         | 1.524                            | 1.360                    |
| <b>8-9</b>                              | 1.478                   | 1.469                   | 1.482                         | 1.477                            | 1.461                    |
| <b>9-10</b>                             | 1.345                   | 1.362                   | 1.342                         | 1.391                            | 1.378                    |
| <b>10-11</b>                            | 1.427                   | 1.425                   | 1.449                         | 1.410                            | 1.414                    |
| <b>11-12</b>                            | 1.420                   | 1.429                   | 1.387                         | 1.443                            | 1.419                    |
| <b>12-13</b>                            | 1.408                   | 1.408                   | 1.420                         | 1.396                            | 1.406                    |
| <b>13-14</b>                            | 1.433                   | 1.430                   | 1.375                         | 1.414                            | 1.417                    |
| <b>13-13<sup>1</sup></b>                | 1.426                   | 1.453                   | 1.448                         | 1.458                            | 1.429                    |
| <b>13<sup>1</sup>-13<sup>2</sup></b>    | 1.591                   | 1.576                   | 1.565                         | 1.584                            | 1.569                    |
| <b>13<sup>2</sup>-15</b>                | 1.524                   | 1.522                   | 1.532                         | 1.535                            | 1.534                    |
| <b>14-15</b>                            | 1.438                   | 1.432                   | 1.448                         | 1.411                            | 1.396                    |
| <b>15-16</b>                            | 1.336                   | 1.357                   | 1.333                         | 1.381                            | 1.364                    |
| <b>16-17</b>                            | 1.517                   | 1.521                   | 1.519                         | 1.523                            | 1.523                    |
| <b>17-18</b>                            | 1.560                   | 1.556                   | 1.543                         | 1.551                            | 1.555                    |
| <b>18-19</b>                            | 1.530                   | 1.521                   | 1.520                         | 1.526                            | 1.525                    |
| <b>19-20</b>                            | 1.415                   | 1.374                   | 1.429                         | 1.395                            | 1.382                    |
| <b>20-1</b>                             | 1.361                   | 1.420                   | 1.363                         | 1.403                            | 1.388                    |
| <b>NA-1</b>                             | 1.386                   | 1.355                   | 1.357                         | 1.374                            | 1.377                    |
| <b>NA-4</b>                             | 1.403                   | 1.448                   | 1.363                         | 1.371                            | 1.385                    |
| <b>NB-6</b>                             | 1.326                   | 1.328                   | 1.290                         | 1.347                            | 1.361                    |
| <b>NB-9</b>                             | 1.446                   | 1.460                   | 1.423                         | 1.388                            | 1.389                    |
| <b>NC-11</b>                            | 1.407                   | 1.415                   | 1.382                         | 1.389                            | 1.403                    |
| <b>NC-14</b>                            | 1.344                   | 1.354                   | 1.323                         | 1.343                            | 1.347                    |
| <b>ND-16</b>                            | 1.440                   | 1.405                   | 1.415                         | 1.378                            | 1.388                    |
| <b>ND-19</b>                            | 1.334                   | 1.387                   | 1.295                         | 1.352                            | 1.349                    |
| <b>Mg-NA</b>                            | 2.030                   | 2.366                   | 2.022                         | 2.026                            | 2.063                    |
| <b>Mg-NB</b>                            | 2.116                   | 2.459                   | 2.123                         | 2.134                            | 2.093                    |
| <b>Mg-NC</b>                            | 2.017                   | 1.830                   | 1.987                         | 2.008                            | 2.022                    |
| <b>Mg-ND</b>                            | 2.123                   | 1.820                   | 2.152                         | 2.162                            | 2.167                    |
| <b>A,B,C,Mg</b>                         | 0.019                   | 0.107                   | 0.071                         | 0.015                            | 0.385                    |
| <b>NA-NB</b>                            | 2.963                   | 3.040                   | 2.944                         | 2.987                            | 2.922                    |
| <b>NA-NC</b>                            | 4.045                   | 4.114                   | 4.006                         | 4.033                            | 4.011                    |
| <b>NA-ND</b>                            | 2.947                   | 2.914                   | 2.945                         | 2.985                            | 2.954                    |
| <b>NB-NC</b>                            | 2.826                   | 2.774                   | 2.872                         | 2.861                            | 2.782                    |
| <b>NB-ND</b>                            | 4.238                   | 4.240                   | 4.274                         | 4.295                            | 4.191                    |
| <b>NC-ND</b>                            | 2.982                   | 3.084                   | 2.960                         | 2.953                            | 2.946                    |

a) 1 is C1; NA is nitrogen in ring A; A,B,C,Mg is the distance between plane NA-NB-NC and the Mg-atom.

b) From ref. 40.

c) From ref. 41.

d) From ref. 84.



**Table 17S:** Calculated heavy atom distances in **Bchl *h***.

| <b>Bchl <i>h</i><br/>distance<sup>a)</sup></b> | <b>PM5<sup>b)</sup></b> | <b>PM3<sup>b)</sup></b> | <b>HF/6-31G<sup>*c)</sup></b> | <b>B3LYP/6-31G<sup>*c)</sup></b> | <b>exp.<sup>d)</sup></b> |
|------------------------------------------------|-------------------------|-------------------------|-------------------------------|----------------------------------|--------------------------|
| <b>1-2</b>                                     | 1.422                   | 1.428                   | 1.484                         | 1.447                            | 1.451                    |
| <b>2-3</b>                                     | 1.405                   | 1.402                   | 1.337                         | 1.385                            | 1.344                    |
| <b>3-4</b>                                     | 1.423                   | 1.439                   | 1.485                         | 1.458                            | 1.475                    |
| <b>4-5</b>                                     | 1.424                   | 1.420                   | 1.358                         | 1.403                            | 1.368                    |
| <b>5-6</b>                                     | 1.343                   | 1.361                   | 1.435                         | 1.396                            | 1.418                    |
| <b>6-7</b>                                     | 1.526                   | 1.518                   | 1.517                         | 1.525                            | 1.463                    |
| <b>7-8</b>                                     | 1.558                   | 1.548                   | 1.542                         | 1.551                            | 1.360                    |
| <b>8-9</b>                                     | 1.527                   | 1.517                   | 1.522                         | 1.527                            | 1.461                    |
| <b>9-10</b>                                    | 1.436                   | 1.441                   | 1.335                         | 1.384                            | 1.378                    |
| <b>10-11</b>                                   | 1.346                   | 1.357                   | 1.455                         | 1.415                            | 1.414                    |
| <b>11-12</b>                                   | 1.515                   | 1.492                   | 1.385                         | 1.441                            | 1.419                    |
| <b>12-13</b>                                   | 1.348                   | 1.364                   | 1.424                         | 1.396                            | 1.406                    |
| <b>13-14</b>                                   | 1.490                   | 1.474                   | 1.374                         | 1.414                            | 1.417                    |
| <b>13-13<sup>1</sup></b>                       | 1.459                   | 1.473                   | 1.447                         | 1.459                            | 1.429                    |
| <b>13<sup>1</sup>-13<sup>2</sup></b>           | 1.576                   | 1.564                   | 1.565                         | 1.585                            | 1.569                    |
| <b>13<sup>2</sup>-15</b>                       | 1.515                   | 1.522                   | 1.532                         | 1.535                            | 1.534                    |
| <b>14-15</b>                                   | 1.373                   | 1.390                   | 1.448                         | 1.412                            | 1.396                    |
| <b>15-16</b>                                   | 1.408                   | 1.399                   | 1.333                         | 1.381                            | 1.364                    |
| <b>16-17</b>                                   | 1.521                   | 1.526                   | 1.519                         | 1.523                            | 1.523                    |
| <b>17-18</b>                                   | 1.561                   | 1.557                   | 1.543                         | 1.551                            | 1.555                    |
| <b>18-19</b>                                   | 1.526                   | 1.516                   | 1.520                         | 1.527                            | 1.525                    |
| <b>19-20</b>                                   | 1.340                   | 1.356                   | 1.431                         | 1.395                            | 1.382                    |
| <b>20-1</b>                                    | 1.430                   | 1.430                   | 1.362                         | 1.403                            | 1.388                    |
| <b>NA-1</b>                                    | 1.384                   | 1.390                   | 1.358                         | 1.375                            | 1.377                    |
| <b>NA-4</b>                                    | 1.387                   | 1.394                   | 1.362                         | 1.370                            | 1.385                    |
| <b>NB-6</b>                                    | 1.428                   | 1.428                   | 1.291                         | 1.352                            | 1.361                    |
| <b>NB-9</b>                                    | 1.326                   | 1.340                   | 1.417                         | 1.377                            | 1.389                    |
| <b>NC-11</b>                                   | 1.413                   | 1.445                   | 1.382                         | 1.387                            | 1.403                    |
| <b>NC-14</b>                                   | 1.355                   | 1.352                   | 1.325                         | 1.345                            | 1.347                    |
| <b>ND-16</b>                                   | 1.341                   | 1.348                   | 1.417                         | 1.377                            | 1.388                    |
| <b>ND-19</b>                                   | 1.428                   | 1.427                   | 1.293                         | 1.353                            | 1.349                    |
| <b>Mg-NA</b>                                   | 2.013                   | 2.331                   | 2.025                         | 2.027                            | 2.063                    |
| <b>Mg-NB</b>                                   | 2.127                   | 2.463                   | 2.118                         | 2.128                            | 2.093                    |
| <b>Mg-NC</b>                                   | 2.038                   | 1.830                   | 1.987                         | 2.012                            | 2.022                    |
| <b>Mg-ND</b>                                   | 2.115                   | 1.827                   | 2.148                         | 2.157                            | 2.167                    |
| <b>A,B,C,Mg</b>                                | 0.021                   | 0.076                   | 0.089                         | 0.028                            | 0.385                    |
| <b>NA-NB</b>                                   | 2.993                   | 3.047                   | 2.933                         | 2.973                            | 2.922                    |
| <b>NA-NC</b>                                   | 4.049                   | 4.073                   | 4.008                         | 4.038                            | 4.011                    |
| <b>NA-ND</b>                                   | 3.007                   | 2.947                   | 2.946                         | 2.991                            | 2.954                    |
| <b>NB-NC</b>                                   | 2.791                   | 2.735                   | 2.870                         | 2.856                            | 2.782                    |
| <b>NB-ND</b>                                   | 4.236                   | 4.266                   | 4.265                         | 4.283                            | 4.191                    |
| <b>NC-ND</b>                                   | 2.932                   | 3.063                   | 2.964                         | 2.957                            | 2.946                    |

a) 1 is C1; NA is nitrogen in ring A; A,B,C,Mg is the distance between plane NA-NB-NC and the Mg-atom.

b) From ref. 40.

c) From ref. 41.

d) From ref. 84.
